# Supplementary material for: Subseasonal Forecast Improvements from Sea Ice Concentration Data Assimilation in the Antarctic
Source: Copernicus journal article supplement (doi:10.5194/egusphere-2025-2807), 2025-07-21
Supplement: Supplementary file 1 [file egusphere-2025-2807-supplement.pdf]

# Supplementary Materials for "Subseasonal Forecast Improvements from Sea Ice Concentration Data Assimilation in the Antarctic"

Yong-Fei Zhang<sup>1</sup>, Mitchell Bushuk<sup>2</sup>, Michael Winton<sup>2</sup>, William Gregory<sup>1</sup>, Bill Hurlin<sup>2</sup>, Liwei Jia<sup>2,3</sup>, and Feiyu Lu<sup>1</sup>

<sup>1</sup>Atmospheric and Oceanic Sciences Program, Princeton University, Princeton, New Jersey

<sup>2</sup>National Oceanic and Atmospheric Administration/Geophysical Fluid Dynamics Laboratory, Princeton, New Jersey

<sup>3</sup>University Corporation for Atmospheric Research, Boulder, Colorado

**Correspondence:** Yong-Fei Zhang (yongfeiz@princeton.edu)

---

<sup>1</sup>The corresponding author's present address: Earth System Science Interdisciplinary Center, University of Maryland, College Park, Maryland

## Detrended SIE ACC (1992-2017)

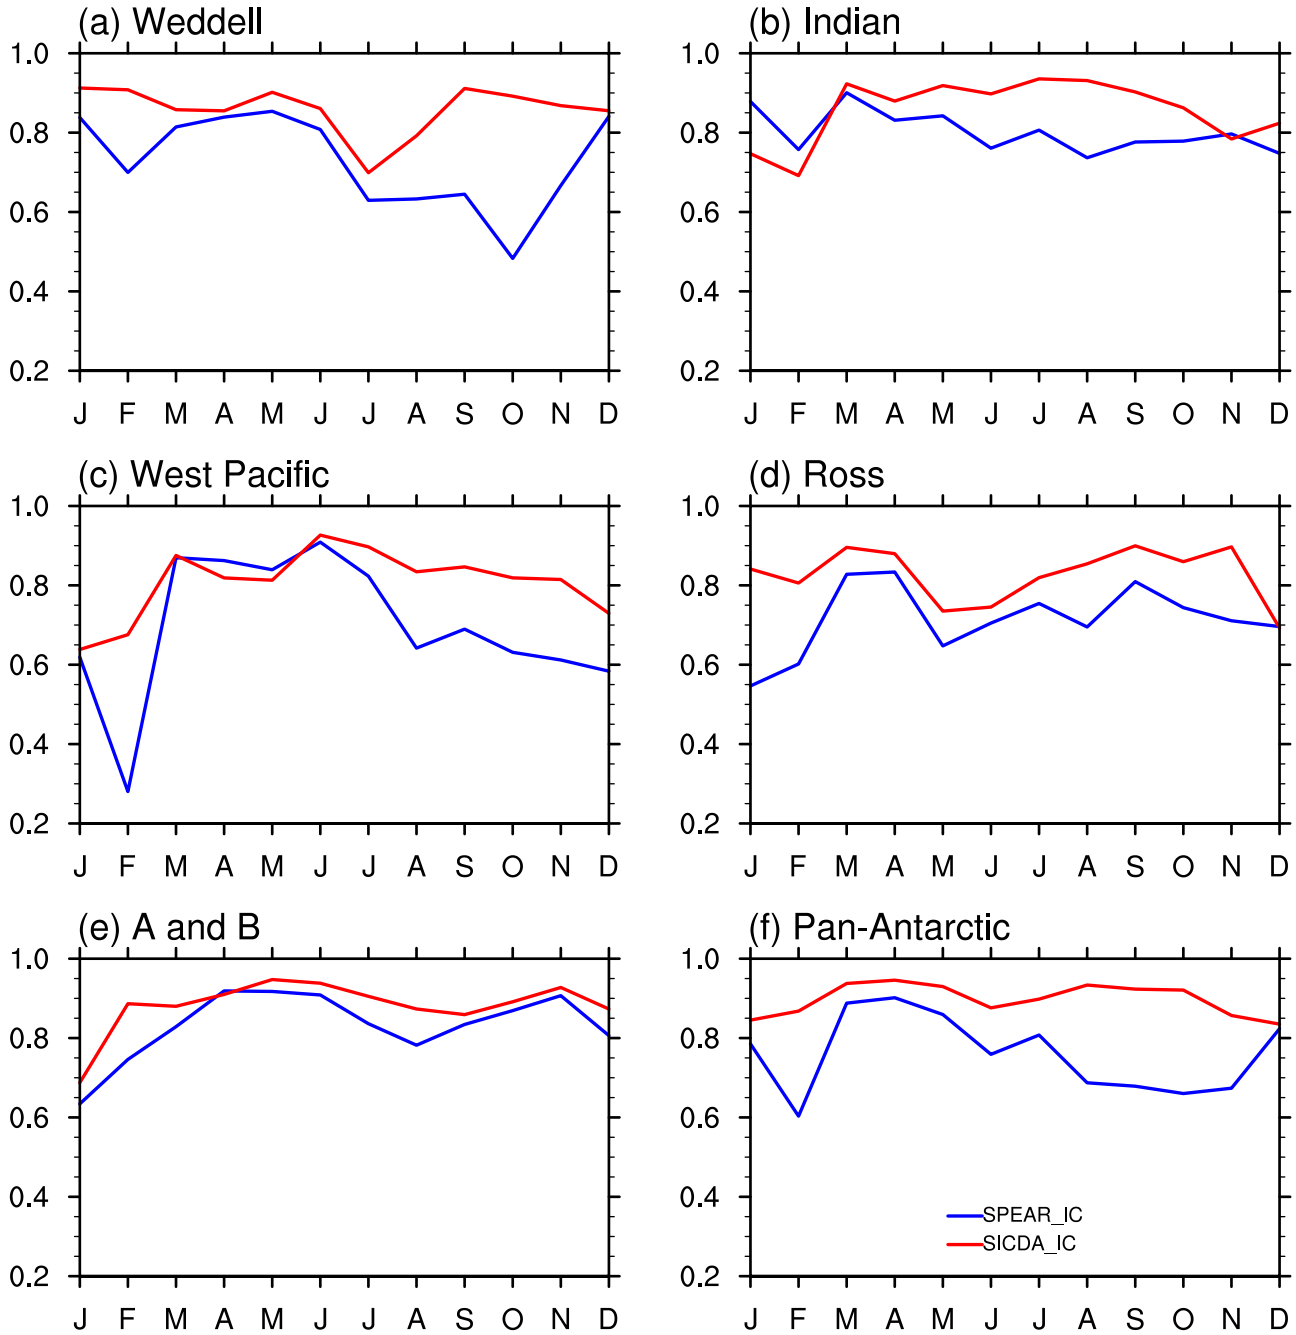

**Figure S1.** Detrended ACC of regional SIE from SPEAR\_IC (blue) and SICDA\_IC (red). The detrended ACC values are calculated against the NSIDC SIC observations using monthly SIE from 1992 to 2017.

# Detrended ACC (SICDA\_IC-SPEAR\_IC)

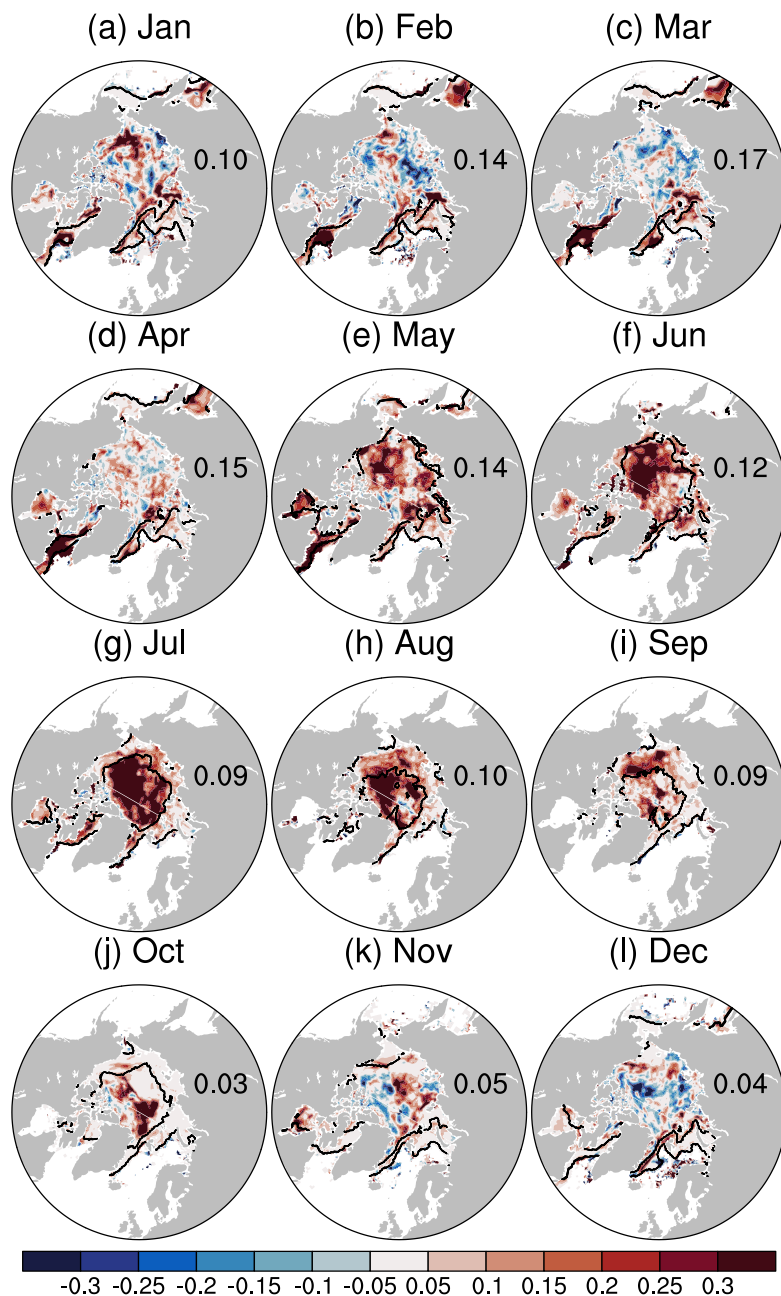

**Figure S2.** The detrended SIC ACC difference between the two ICs (SICDA\_IC - SPEAR\_IC) in the Arctic. The ACC The black lines on each map represent the 10% SIC interannual variability zone. The numbers on each map are the area-weighted average of the ACC difference within the 10% SIC variability zone.

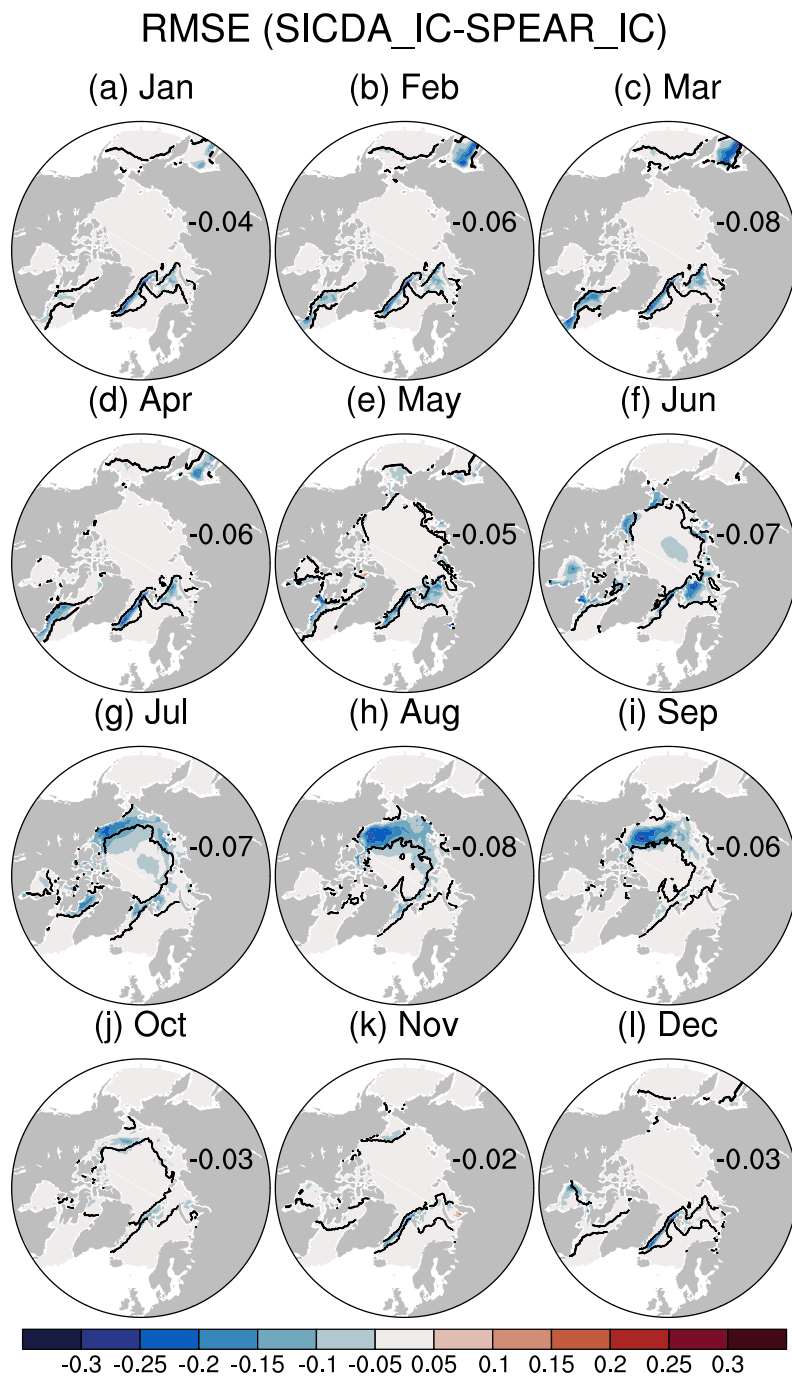

**Figure S3.** The SIC RMSE difference between the two ICs (SICDA\_IC - SPEAR\_IC) in the Arctic. The black lines on each map represent the 10% SIC interannual variability zone. The numbers on each map are the area-weighted average of the RMSE difference within the 10% SIC variability zone.

# Climatology of SIV ( $10^6\text{km}^3$ ; 1992-2017)

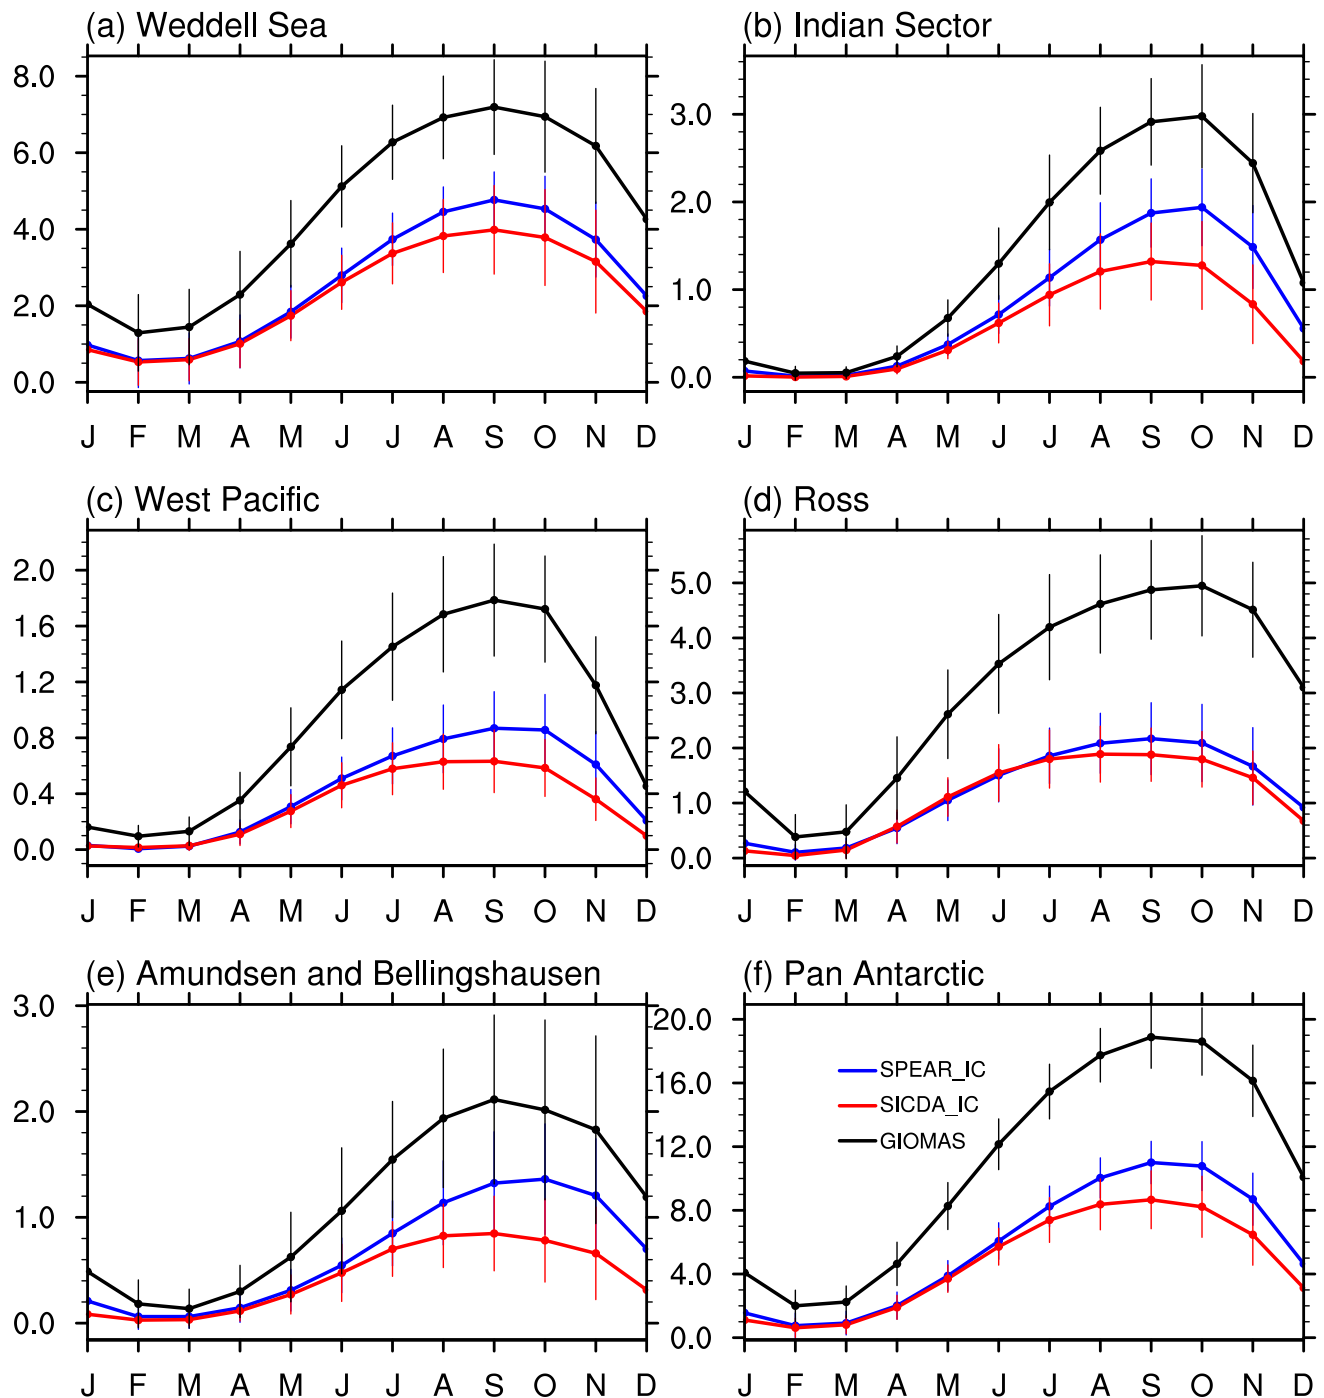

**Figure S4.** The 26-year (1992–2017) mean seasonal cycle of Antarctic SIV for SPEAR\_IC (blue), SICDA\_IC (red), and GIOMAS (black). Each error bar represents two standard deviations of regional SIE calculated over the years.

# Climatology of SIV (1992-2017)

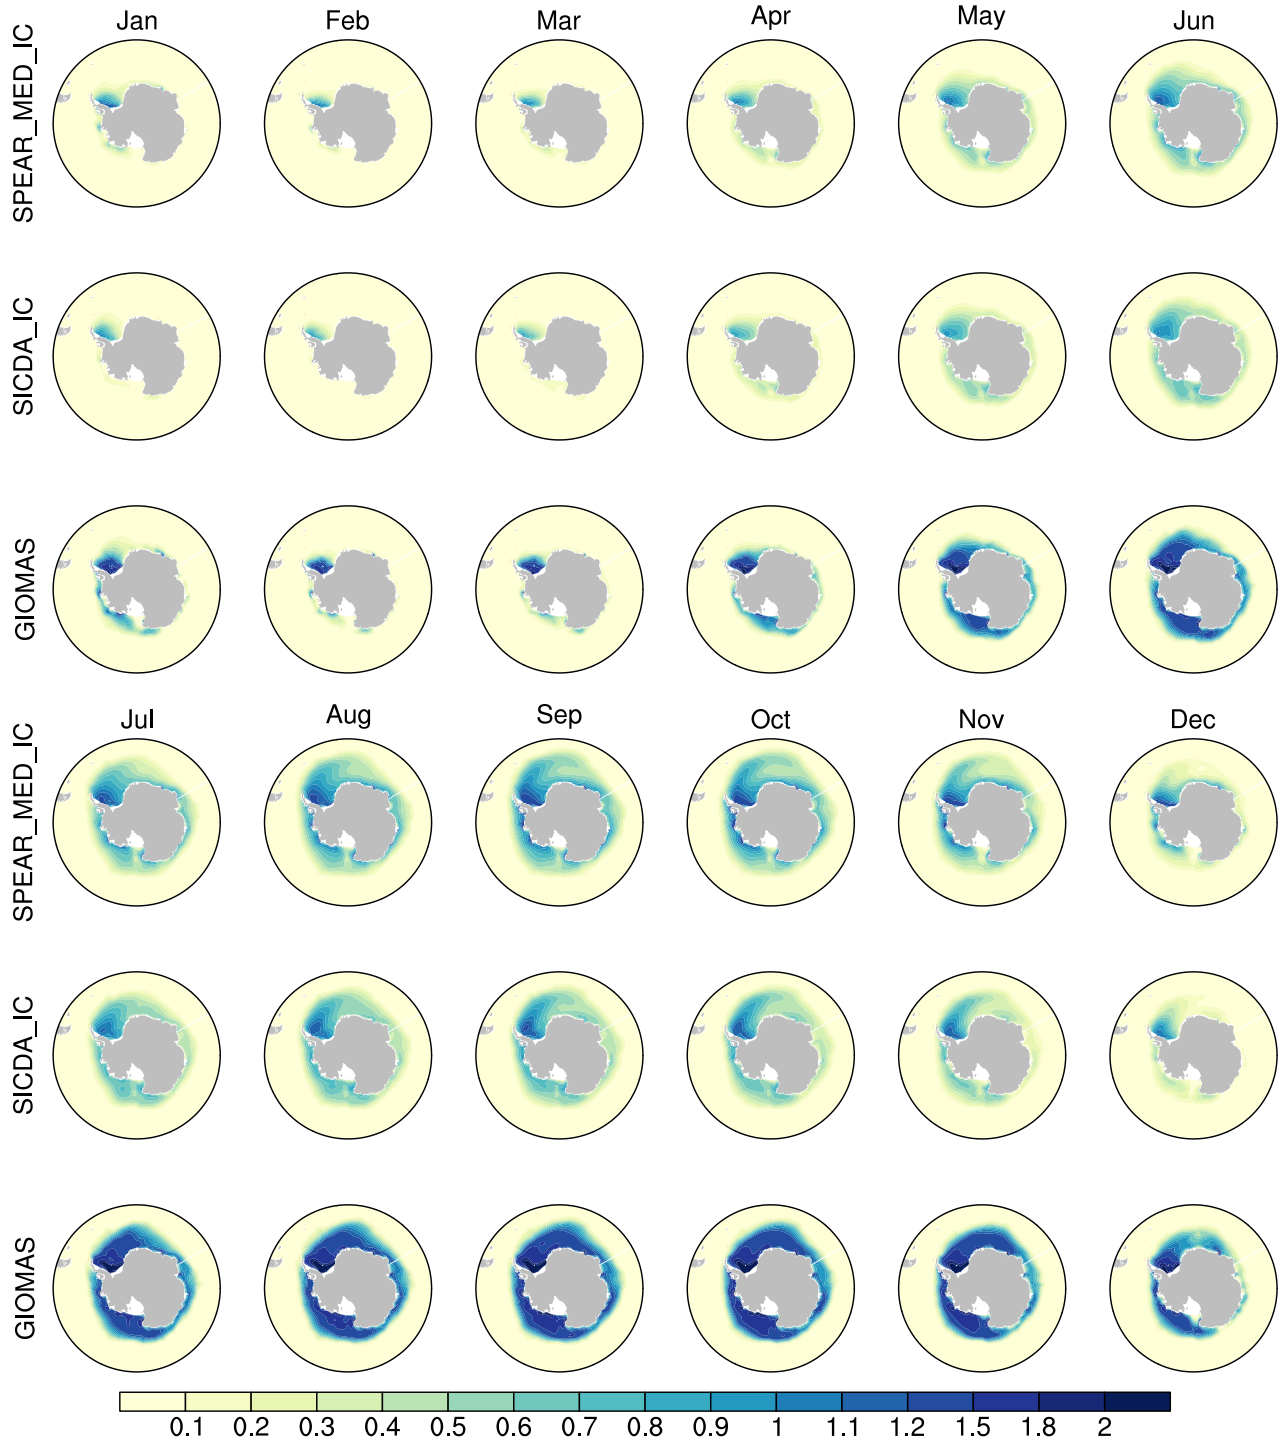

**Figure S5.** The 26-year (1992–2017) mean Antarctic SIV for SPEAR\_IC, SICDA\_IC, and GIOMAS.

# Detrended ACC (SICDA\_MED - SPEAR\_MED)

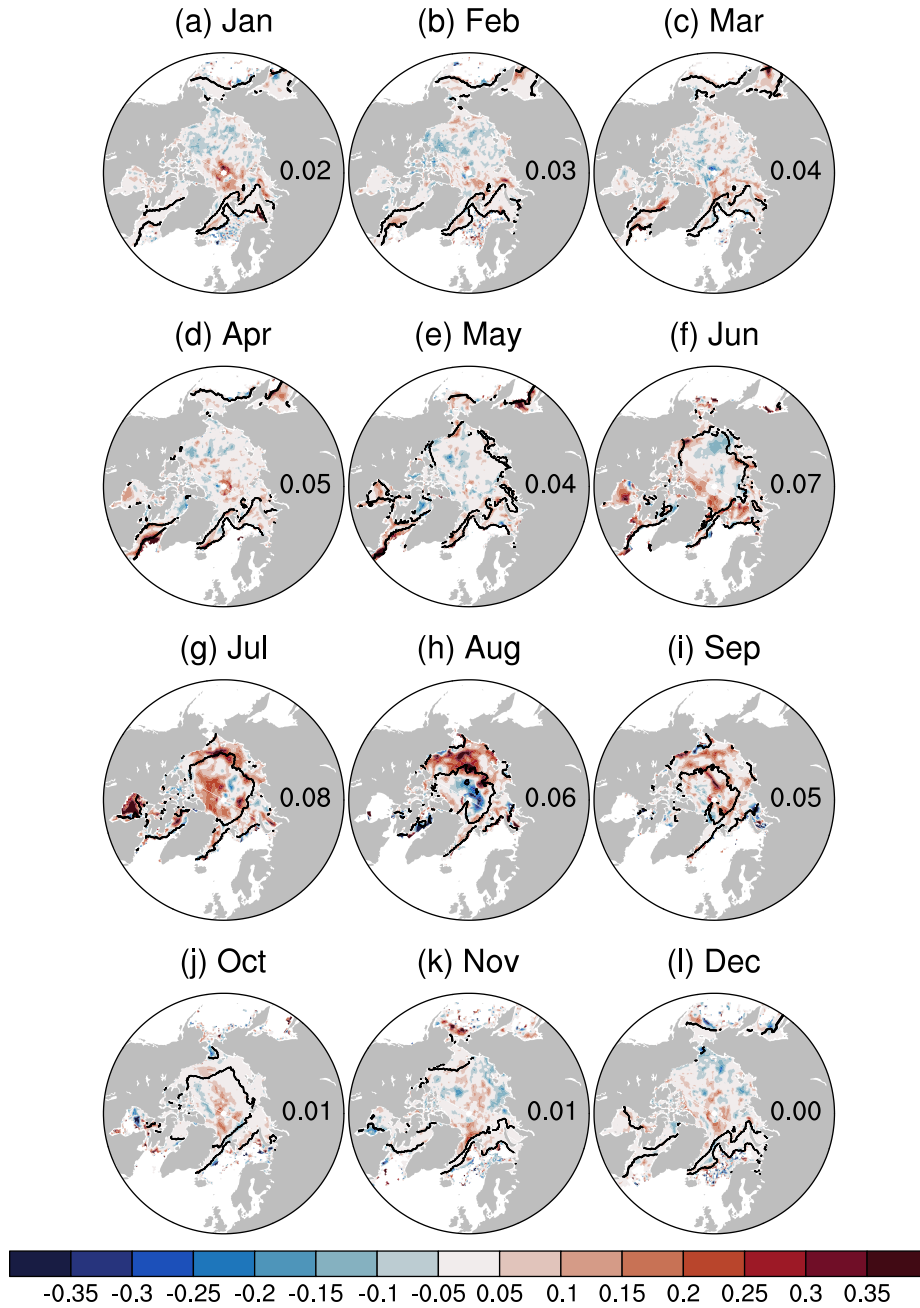

**Figure S6.** 45-forecast-day mean of the detrended SIC ACC difference between the two reforecast experiments (SICDA - SPEAR). The black lines on each map represent the 10% SIC interannual variability zone calculated based on observations. The numbers on each map are the area-weighted average of the ACC difference within the 10% SIC variability zone.

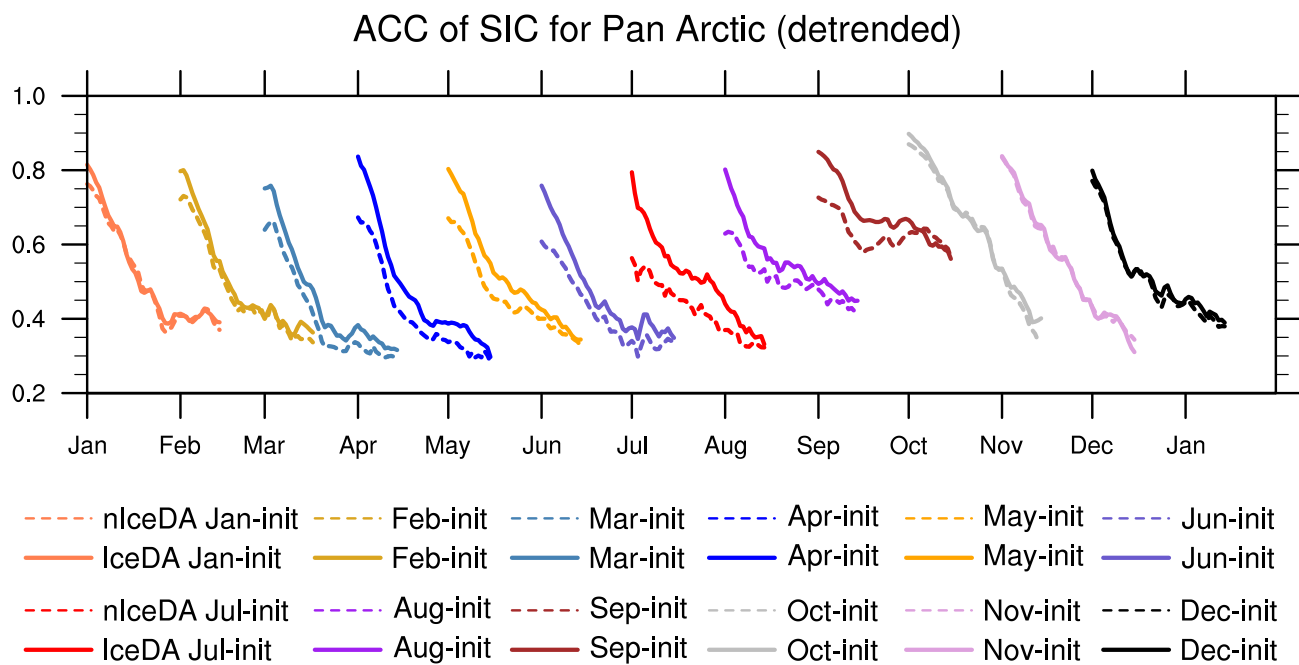

**Figure S7.** Detrended ACC of SIC as a function of forecasting days from the 12-initialization months for SPEAR\_MED (dashed lines) and SICDA (solid lines).

# December Monthly Mean States from Dec-initialized Reforecasts (SICDA – SPEAR)

(a) SIC

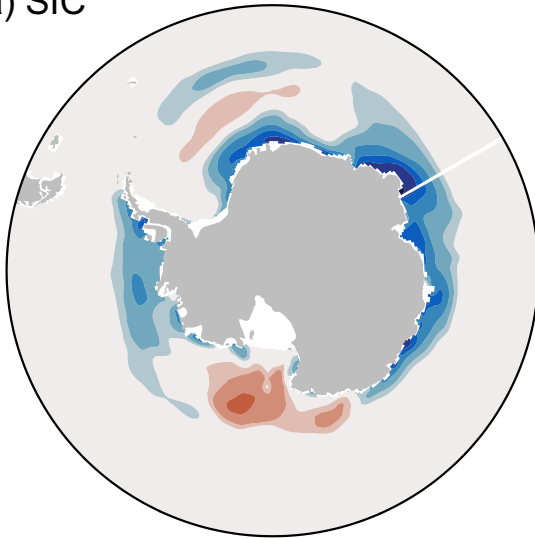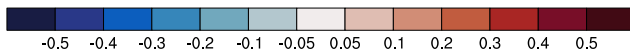

(b) SIV (*m*)

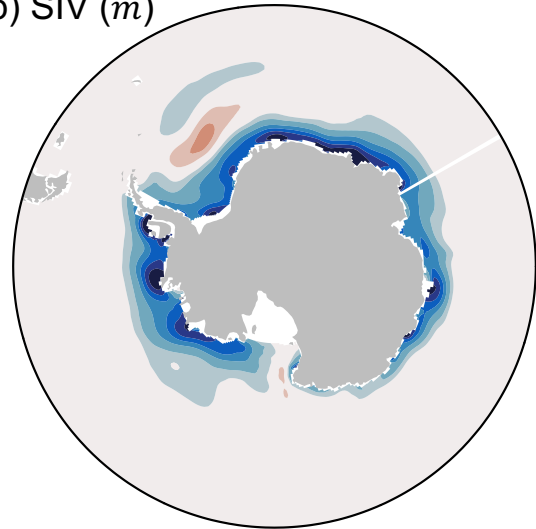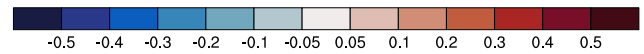

(c) SW ( $W/m^2$ )

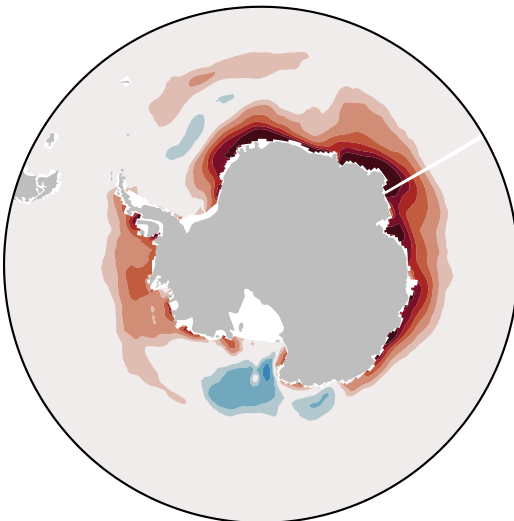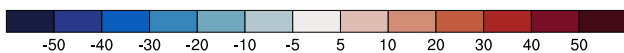

(d) SST ( $^{\circ}C$ )

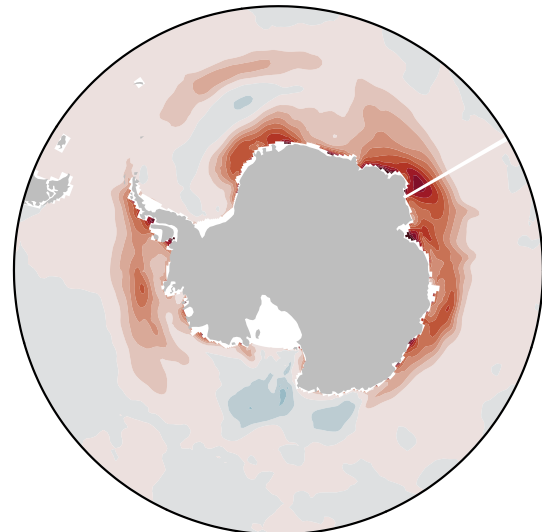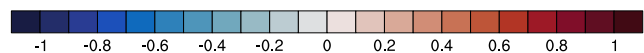

**Figure S8.** The difference of December monthly mean states between the December-initialized reforecast experiments from SICDA and SPEAR (SICDA – SPEAR) (a) SIC, (b) SIV, (c) SW, and (d) SST.
